# Supplementary material for: Unexpected Effect of IL-1β on the Function of GABAA Receptors in Pediatric Focal Cortical Dysplasia
Source: MDPI journal article supplement (doi:10.3390/brainsci12060807), 2022-06-19
Supplement: s1 [file s1]

**Supplementary Table S1. Clinical information of the pediatric study cohort used for transcriptomic analysis**

|    | <b>Diagnosis</b> | <b>Gender</b> | <b>Onset Age (year)</b> | <b>Age At Time of Operation (years)</b> | <b>Seizure Frequency (months)</b> | <b>Area of Resection</b> | <b>Mutation</b> |
|----|------------------|---------------|-------------------------|-----------------------------------------|-----------------------------------|--------------------------|-----------------|
| 1  | Control          | f             | NA                      | 0                                       | NA                                | Cortex                   | NA              |
| 2  | Control          | m             | NA                      | 10                                      | NA                                | Cortex                   | NA              |
| 3  | Control          | f             | NA                      | 0                                       | NA                                | Cortex                   | NA              |
| 4  | Control          | f             | NA                      | 2                                       | NA                                | Cortex                   | NA              |
| 5  | Control          | f             | NA                      | 0                                       | NA                                | Cortex                   | NA              |
| 6  | Control          | m             | NA                      | 10                                      | NA                                | Cortex                   | NA              |
| 7  | FCD 2b           | f             | 3                       | 9                                       | 9                                 | Frontal                  | MTOR            |
| 8  | FCD 2b           | m             | 3                       | 5                                       | 152                               | Frontal                  | MTOR            |
| 9  | FCD 2b           | m             | 3                       | 5                                       | 304                               | Occipital                | NA              |
| 10 | FCD 2b           | m             | 1                       | 3                                       | 152                               | Parietal                 | NA              |
| 11 | FCD 2b           | f             | 4                       | 10                                      | 91                                | Temporal                 | TSC1            |
| 12 | FCD 2b           | f             | 0                       | 11                                      | 17                                | Temporal                 | NA              |
| 13 | FCD 2b           | m             | 0                       | 6                                       | 609                               | Frontal                  | NA              |
| 14 | FCD 2b           | m             | 3                       | 8                                       | 913                               | Parietal                 | MTOR            |
| 15 | FCD 2b           | f             | 3                       | 5                                       | 122                               | Temporal                 | NA              |
| 16 | FCD 2b           | f             | 1                       | 9                                       | 30                                | Temporal                 | NA              |
| 17 | FCD 2b           | m             | 0                       | 2                                       | 30                                | Frontal                  | NA              |
| 18 | FCD 2b           | f             | 1                       | 8                                       | 30                                | Frontal                  | NA              |
| 19 | FCD 2b           | m             | 0                       | 3                                       | 30                                | Frontal                  | NA              |
| 20 | FCD 2b           | f             | 10                      | 10                                      | 30                                | Frontal                  | NA              |
| 21 | FCD 2b           | f             | 3                       | 8                                       | 609                               | Occipital                | NA              |
| 22 | FCD 2b           | f             | 0                       | 3                                       | 517                               | Frontal                  | MTOR            |
| 23 | FCD 2b           | m             | 3                       | 10                                      | 30                                | Frontal                  | MTOR            |
| 24 | FCD 2b           | m             | 1                       | 2                                       | 91                                | Frontal                  | NA              |

Abbreviations: m=male; f=female.
